# Supplementary material for: Integrating Stomach Content and Stable Isotope Analyses to Quantify the Diets of Pygoscelid Penguins
Source: PubMed Central journal article supplement (PMC3203888; doi:10.1371/journal.pone.0026642), 2011-10-28
Supplement: pone.0026642.s001.pdf [file pone.0026642.s001.pdf]

**Table S1.** The frequency occurrence (%FO), minimum number of individuals (MNI), percent of MNI (%MNI), reconstituted mass (Mass), and percent of reconstituted mass (%Mass) of fish species identified from stomach contents collected from adult Chinstrap and Gentoo penguins during the crèche period at Cape Shirreff, Livingston Island in 2008 and 2009.

| Penguin species, fish prey      | 2008 |     |      |          |       | 2009 |      |       |          |       |
|---------------------------------|------|-----|------|----------|-------|------|------|-------|----------|-------|
|                                 | %FO  | MNI | %MNI | Mass (g) | %Mass | %FO  | MNI  | %MNI  | Mass (g) | %Mass |
| <b>Chinstrap penguin</b>        |      |     |      |          |       |      |      |       |          |       |
| <i>Protomyctophum bolini</i>    | 3.3  | 1   | 1.9  | 0.5      | 0.1   | 0.0  | 0    | 0.0   | 0.0      | 0.0   |
| <i>Electrona antarctica</i>     | 23.3 | 28  | 52.8 | 161.1    | 17.2  | 0.0  | 0    | 0.0   | 0.0      | 0.0   |
| <i>Gymnoscopelus nicholsi</i>   | 13.3 | 5   | 9.4  | 148.4    | 15.8  | 0.0  | 0    | 0.0   | 0.0      | 0.0   |
| <i>Notolepis coatsi</i>         | 13.3 | 14  | 26.4 | 566.5    | 60.5  | 0.0  | 0    | 0.0   | 0.0      | 0.0   |
| <i>Pleuragramma antarcticum</i> | 3.3  | 2   | 3.8  | 1.9      | 0.2   | 43.3 | 42   | 100.0 | 103.0    | 100.0 |
| <i>Trematomus newnesi</i>       | 10.0 | 3   | 5.7  | 58.0     | 6.2   | 0.0  | 0    | 0.0   | 0.0      | 0.0   |
| <b>Gentoo penguin</b>           |      |     |      |          |       |      |      |       |          |       |
| <i>Gymnoscopelus nicholsi</i>   | 30.0 | 11  | 10.1 | 375.7    | 24.2  | 0.0  | 0    | 0.0   | 0.0      | 0.0   |
| <i>Lepidonotothen sp.</i>       | 40.0 | 13  | 11.9 | 74.4     | 4.8   | 42.9 | 13   | 0.4   | 41.2     | 1.0   |
| <i>Pleuragramma antarcticum</i> | 40.0 | 61  | 56.0 | 124.8    | 8.0   | 92.9 | 2947 | 99.3  | 3701.3   | 89.8  |
| <i>Trematomus newnesi</i>       | 40.0 | 4   | 3.7  | 312.2    | 20.1  | 7.1  | 1    | 0.0   | 179.6    | 4.4   |
| <i>Champtocephalus gunnari</i>  | 50.0 | 14  | 12.8 | 668.4    | 43.0  | 21.4 | 4    | 0.1   | 197.6    | 4.8   |
| Unknown fish sp.                | 50.0 | 6   | 5.5  | -        | -     | 7.1  | 2    | 0.1   | -        | -     |
