# Supplementary material for: Integrating Stomach Content and Stable Isotope Analyses to Quantify the Diets of Pygoscelid Penguins
Source: PubMed Central journal article supplement (PMC3203888; doi:10.1371/journal.pone.0026642), 2011-10-28
Supplement: pone.0026642.s002.pdf [file pone.0026642.s002.pdf]

**Table S2.** Discrimination factors, sample sizes, isotopic signatures and elemental concentrations of prey source inputs into SIAR mixing models [21].

| Model, Inputs                            | <i>n</i> | $\delta^{15}\text{N}$ (‰) | $\delta^{13}\text{C}$ (‰) | % N                   | % C                   | Source |
|------------------------------------------|----------|---------------------------|---------------------------|-----------------------|-----------------------|--------|
| <b>SIAR Model 1</b>                      |          |                           |                           |                       |                       |        |
| Discrimination factor                    | -        | 3.5±0.4                   | 1.3±0.5                   | -                     | -                     | [47]   |
| Source 1: Krill ( <i>E. superba</i> )    | 40       | 3.3±0.6                   | -26.4±1.4                 | 10.0±1.0              | 37.0±4.2              | -      |
| Source 2: Fish ( <i>P. antarcticum</i> ) | 30       | 9.4±0.5                   | -24.7±0.4                 | 12.0±1.0              | 40.0±2.0              | [24]   |
| <b>SIAR Model 2</b>                      |          |                           |                           |                       |                       |        |
| Discrimination factor                    | -        | 3.5±0.4                   | 1.3±0.5                   | -                     | -                     | [47]   |
| Source 1: Krill ( <i>E. superba</i> )    | 40       | 3.3±0.6                   | -26.4±1.4                 | 10.0±1.0              | 37.0±4.2              | -      |
| Source 2: Fish (Weighted by %mass)       |          |                           |                           |                       |                       |        |
| Chinstrap 2008                           | 11       | 7.9±0.7                   | -25.1±0.5                 | 12.8±1.0              | 41.0±1.2              | -      |
| Chinstrap 2009                           | 30       | 9.4±0.5                   | -24.7±0.4                 | 12.0±1.0              | 40.0±2.0              | -      |
| Gentoo 2008                              | 8        | 8.8±0.4                   | -24.4±0.5                 | 12.4±1.0              | 40.8±1.8              | -      |
| Gentoo 2009                              | 28       | 9.3±0.5                   | -24.7±0.4                 | 12.0±1.0              | 40.0±2.0              | -      |
| <b>SIAR Models 3 &amp; 4 (2008 only)</b> |          |                           |                           |                       |                       |        |
| <i>Chinstrap Penguins:</i>               |          |                           |                           |                       |                       |        |
| Discrimination factor                    | -        | 3.5±0.4                   | 1.3±0.5                   | -                     | -                     | [47]   |
| Source 1: Krill ( <i>E. superba</i> )    | 40       | 3.3±0.6                   | -26.4±1.4                 | 10.0±1.0              | 37.0±4.2              | -      |
| Source 2: Fish ( <i>P. bolini</i> )      | 13       | 9.2±0.5                   | -23.0±0.5                 | 12.0±1.0 <sup>1</sup> | 40.0±2.0 <sup>1</sup> | [45]   |
| Source 3: Fish ( <i>E. antarctica</i> )  | 41       | 8.8±0.7                   | -25.5±0.7                 | 12.0±1.0              | 39.0±2.0              | -      |
| Source 4: Fish ( <i>G. nicholsi</i> )    | 6        | 9.4±0.3                   | -22.6±0.8                 | 13.0±1.0              | 43.0±1.0              | -      |
| Source 5: Fish ( <i>N. coatsi</i> )      | 3        | 7.2±0.8                   | -25.7±0.4                 | 13.0±1.0              | 41.0±1.0              | -      |
| Source 6: Fish ( <i>P. antarcticum</i> ) | 30       | 9.4±0.5                   | -24.7±0.4                 | 12.0±1.0              | 40.0±2.0              | [24]   |
| Source 7: Fish ( <i>T. newnesi</i> )     | 10       | 8.2±0.5                   | -24.8±0.5                 | 13.0±1.0              | 41.0±2.0              | -      |
| <i>Gentoo Penguins:</i>                  |          |                           |                           |                       |                       |        |
| Discrimination factor                    | -        | 3.5±0.4                   | 1.3±0.5                   | -                     | -                     | [47]   |
| Source 1: Krill ( <i>E. superba</i> )    | 40       | 3.3±0.6                   | -26.4±1.4                 | 10.0±1.0              | 37.0±4.2              | -      |
| Source 2: Fish ( <i>G. nicholsi</i> )    | 6        | 9.4±0.3                   | -22.6±0.8                 | 13.0±1.0              | 43.0±1.0              | -      |
| Source 3: Fish ( <i>L. squamifrons</i> ) | 10       | 9.6±0.8                   | -24.2±0.7                 | 11.0±1.0              | 37.0±2.0              | [24]   |
| Source 4: Fish ( <i>P. antarcticum</i> ) | 30       | 9.4±0.5                   | -24.7±0.4                 | 12.0±1.0              | 40.0±2.0              | [24]   |
| Source 5: Fish ( <i>T. newnesi</i> )     | 10       | 8.2±0.5                   | -24.8±0.5                 | 13.0±1.0              | 41.0±2.0              | -      |
| Source 6: Fish ( <i>C. gunnari</i> )     | 5        | 8.5±0.3                   | -25.1±0.3                 | 12.0±1.0              | 40.0±2.0              | [44]   |

<sup>1</sup>%N and %C values for *P. bolini* and *C. gunnari* were not available so averaged values from the six other fish species examined in this study were used. See respective numbers in reference section of the text for source information.
